# Supplementary material for: A next-generation tumor-targeting IL-2 preferentially promotes tumor-infiltrating CD8+ T-cell response and effective tumor control
Source: Nat Commun. 2019 Aug 28;10:3874. doi: 10.1038/s41467-019-11782-w (PMC6713724; doi:10.1038/s41467-019-11782-w)
Supplement: Supplementary file 1 — Supplementary Information [file 41467_2019_11782_MOESM1_ESM.pdf]

# Supplementary Figure 1

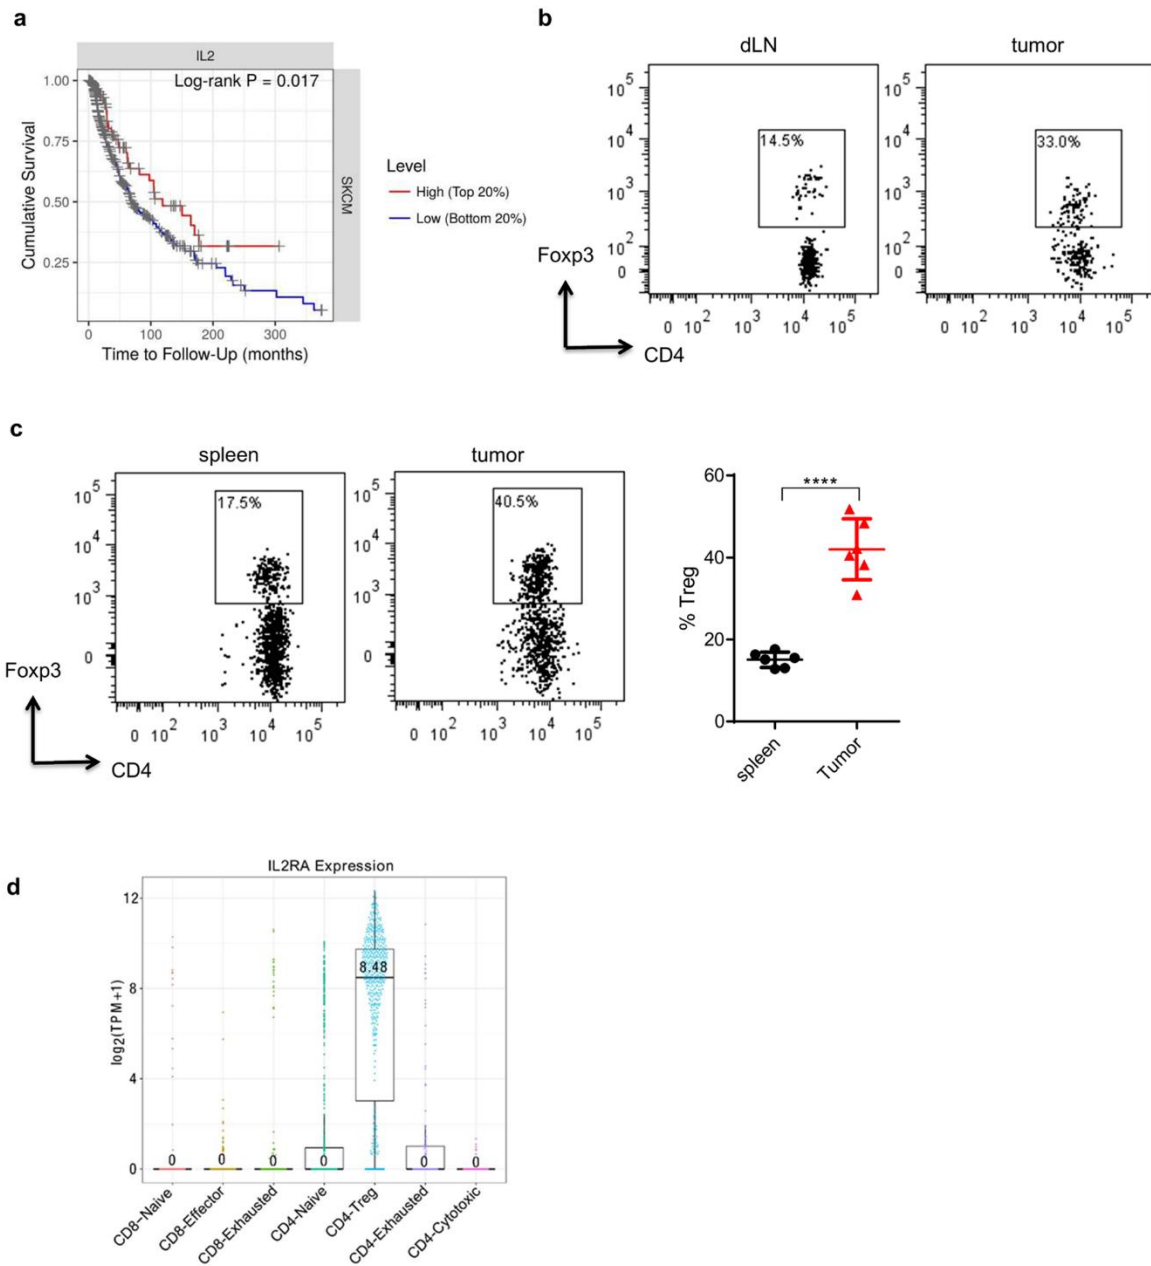

**Supplementary Fig. 1 High Treg infiltration may promote tumor progression and limit the therapeutic effect of IL-2.** (a) The correlation of IL-2 expression level and the survival of skin cutaneous melanoma patients were analyzed by TIMER. (b) WT C57BL/6 mice (n=3-5/group) were injected subcutaneously with  $5 \times 10^5$  B16F10 cells. The tumor tissues were collected on day 14, and the percentages of Treg cells among CD4<sup>+</sup> T cells within tumor tissues and draining lymph nodes were detected by flow cytometry. (c) WT C57BL/6 mice (n=5-6/group) were injected subcutaneously with  $5 \times 10^5$  MC38 cells. The tumor tissues were collected on day 14, and the percentages of Treg cells among CD4<sup>+</sup> T cells within the tumor and spleen tissue was detected by flow cytometry. (d) The expression of IL-2 alpha receptor on tumor-infiltrating lymphocytes was analyzed with the published single-cell RNA-sequencing data from hepatocellular carcinoma patients. Unpaired T-tests were used to analyze the other data. ns (not significant), \*P<0.05, \*\*P<0.01, \*\*\*P<0.0001 and \*\*\*\*P<0.0001. One of two or three representative experiments is shown.

## Supplementary Figure 2

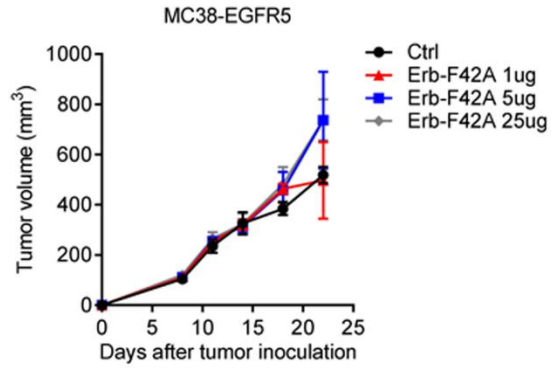

**Supplementary Fig. 2 F42A mutant IL-2 is not able to effectively control tumor growth.** WT C57BL/6 mice (n=5/group) were injected subcutaneously with  $5 \times 10^5$  MC38-EGFR5 and i.p. treated with 1 $\mu$ g, 5 $\mu$ g or 25 $\mu$ g of Erb-F42A IL2 on days 8, 11 and 14. The tumor volume was measured twice a week.

### Supplementary Figure 3

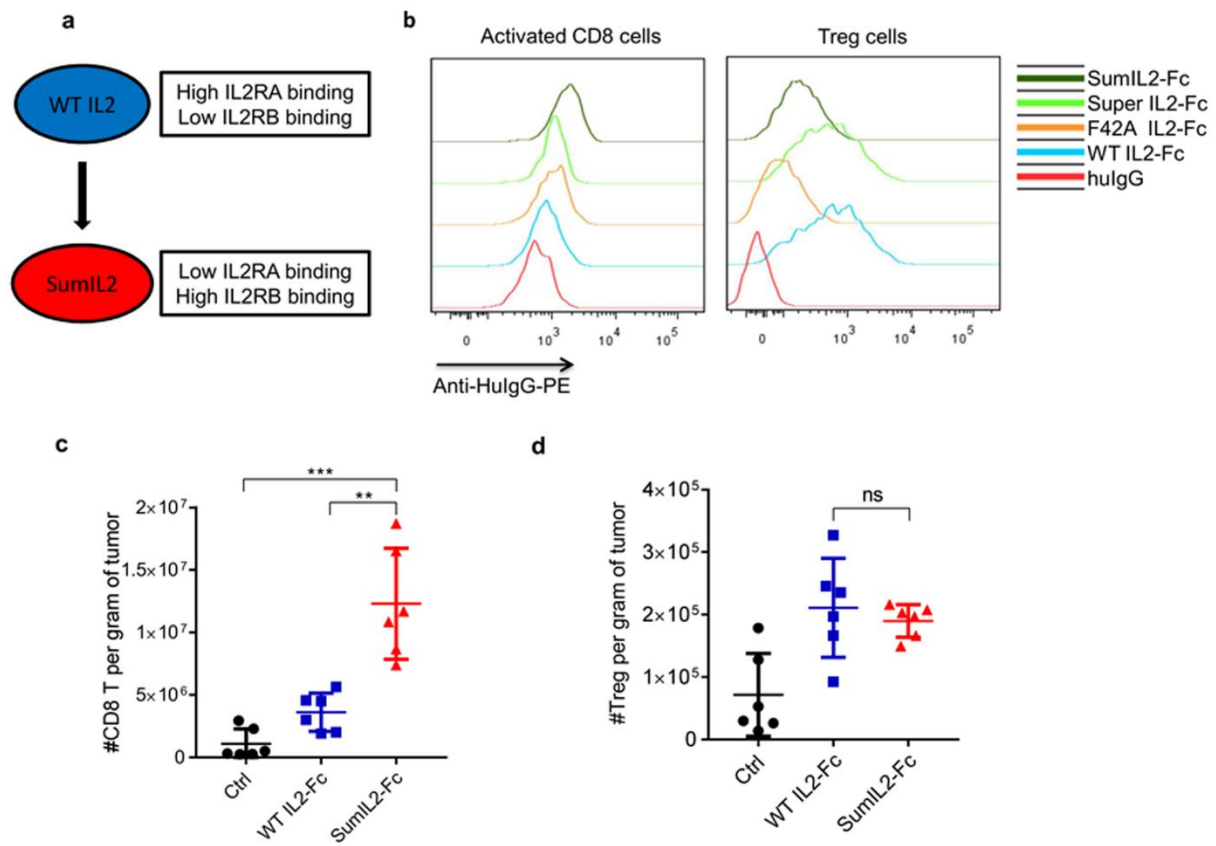

**Supplementary Fig. 3 SumIL-2 induces more CD8<sup>+</sup> T cells than WT IL-2.** (a) Super mutant IL2 has F42A, L80F, R81D, L85V, I86V and I92F mutation. (b) Foxp3-GFP mice spleen cells were incubated with human IgG, WT IL2-Fc, F42A IL2-Fc, super IL2-Fc or sumIL2-Fc (0.4μg/ml), followed by anti-huIgG-PE staining. (c, d) WT C57BL/6 mice (n=5/group) were injected subcutaneously with 5×10<sup>5</sup> B16F10 and i.t. treated with 5μg of WT IL-2 or sumIL2-Fc on day 9. The tumor tissues were collected on day 12, CD8/CD4 ratio in tumor tissue was analyzed by flow cytometry. The absolute number of CD8<sup>+</sup> T cells (c) and Treg cells (d) in tumor tissues were counted.

# Supplementary Figure 4

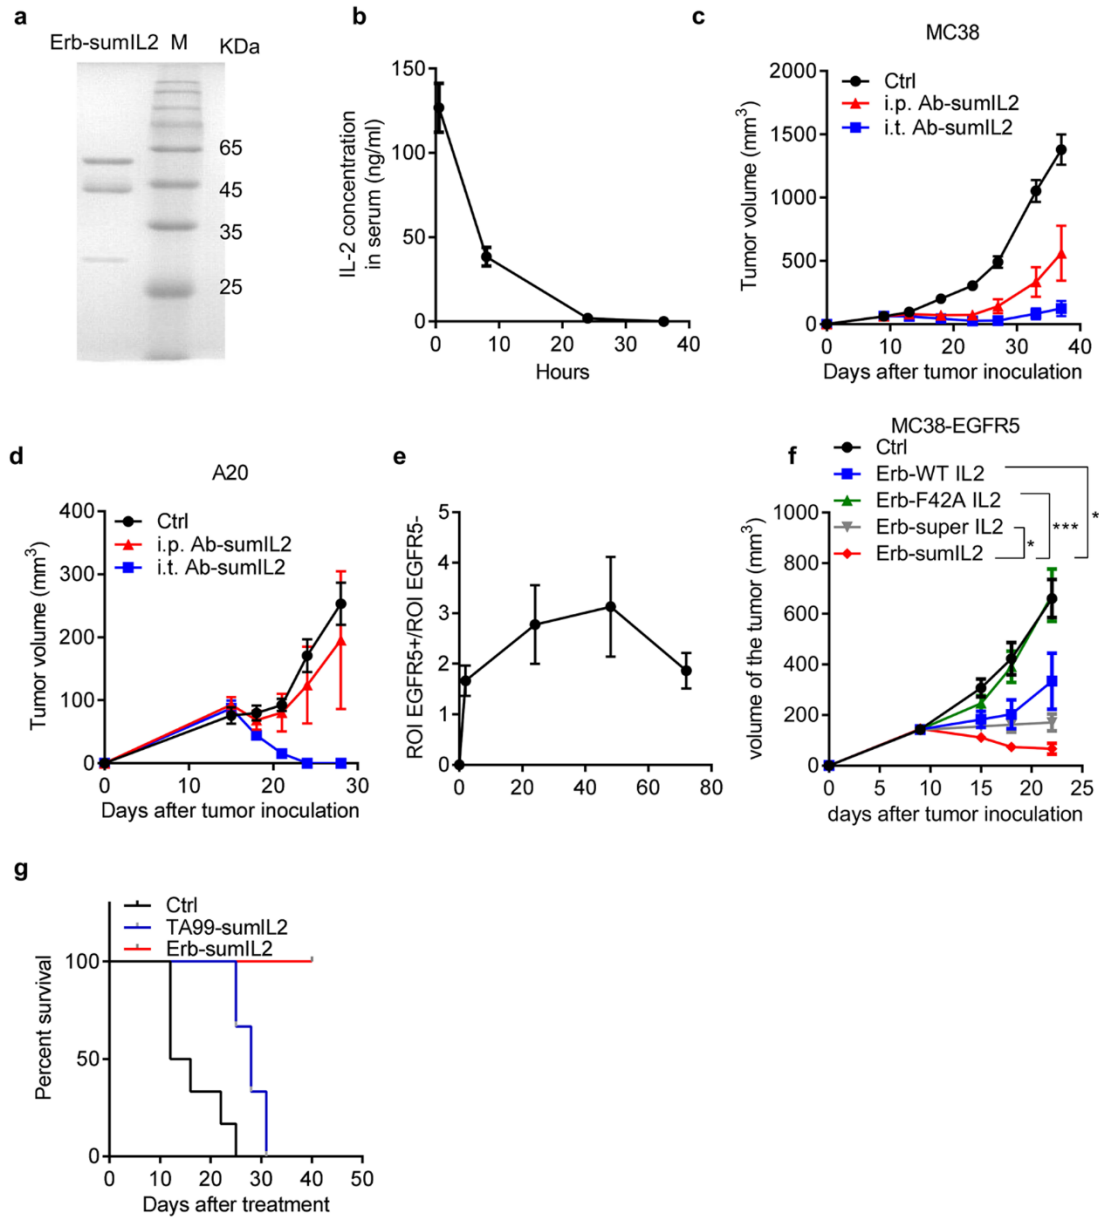

**Supplementary Fig. 4. Targeting effect is critical for sumIL-2 therapy.** (a) The purity of Erb-sumIL2 was assessed by SDS-PAGE. (b) The half-life of Erb-sumIL2 in serum was assessed by ELISA. (c) C57BL/6 mice (n=5/group) were injected subcutaneously with  $5 \times 10^5$  of MC38 cells, and 10 $\mu$ g of Erb-sumIL2 was administered (i.p. or i.t.) on days 9, 13, and 17. The growth of the tumor was measured and compared twice a week. (d) BALB/c mice (n=3-5/group) were injected subcutaneously with  $3 \times 10^6$  of A20 cells, 10 $\mu$ g of Erb-sumIL2 was administered (i.p. or i.t.) on days 15 and 18. The growth of the tumor was measured and compared twice a week. (e) MC38 (left flank) and MC38-EGFR5 (right flank) tumor-bearing mice were treated with single dose of PBS or 25 $\mu$ g Erb-sumIL2 (i.v.); the ratio fluorescence intensity of MC38-EGFR5 tumor /MC38 tumor post Erb-sumIL2 treatment. (f) C57BL/6 mice (n=5/group) were injected subcutaneously with  $5 \times 10^5$  MC38-EGFR5 cells, and then i.p. treated with 25 $\mu$ g of Erb-IL2 variants on day 9 and the tumor volume was measured. (g) C57BL/6 mice were (n=5/group) injected subcutaneously with  $5 \times 10^5$  of MC38-EGFR5 cells, and then i.v. treated on days 7 and 10 with PBS, 25 $\mu$ g of Erb-sumIL2 or 25 $\mu$ g TA99-sumIL2.

## Supplementary Figure 5

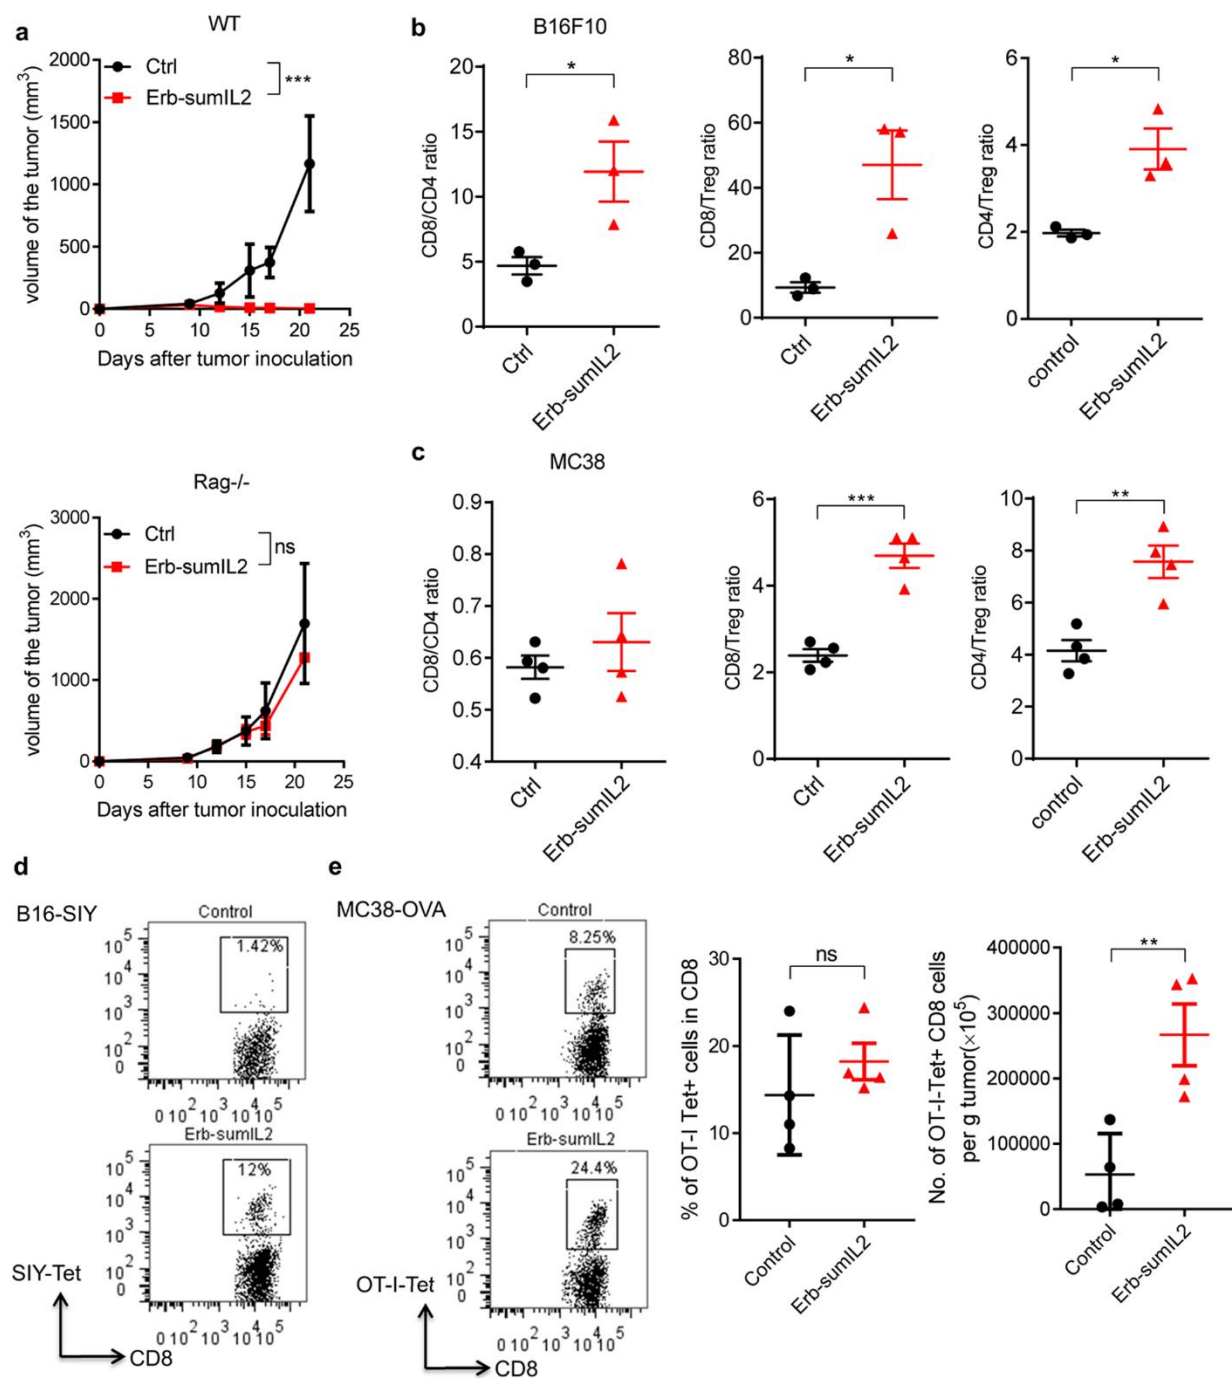

**Supplementary Fig. 5. Ab-sumIL2 therapy increases CD8/Treg ratio and promotes CTL response.** (a) upper panel, C57BL/6 mice were injected subcutaneously with  $5 \times 10^5$  of B16F10 cells, and then i.t. treated on days 9, 12 and 15 with PBS or 10 $\mu$ g of Erb-sumIL2; lower panel, B16F10-bearing Rag1 knockout (KO) mice were i.t. treated with 10 $\mu$ g of Erb-sumIL2 or PBS on the same time point. (b) WT C57BL/6 mice were injected subcutaneously with  $5 \times 10^5$  B16F10 cells and i.t. treated with 10 $\mu$ g Erb-sumIL2 on day 9. The tumor tissues were collected on day 12, and the percentages of CD45<sup>+</sup> among total live cells, the ratio of CD8/CD4, CD8/Treg, and CD4/Treg were analyzed by flow cytometry. (c) WT C57BL/6 mice were injected subcutaneously with  $5 \times 10^5$  MC38 cells and i.t. treated with 10 $\mu$ g of Erb-sumIL2 on day 9. The tumor tissues were collected on day 12, and the percentages of CD45<sup>+</sup> among total live cells, the ratio of CD8/CD4, CD8/Treg, and CD4/Treg were analyzed by flow cytometry. (d) WT C57BL/6 mice were injected subcutaneously with  $7.5 \times 10^5$  B16-SIY cells and i.t. treated with 10 $\mu$ g of Erb-sumIL2 on day 9. The tumor tissues were collected on day 15. Antigen-specific CD8<sup>+</sup> T cells within the tumor were detected using SIY-specific tetramer. The frequency of SIY specific CD8<sup>+</sup> T cells among total CD8<sup>+</sup> T cells and the number of SIY-specific CD8<sup>+</sup> T cells were analyzed by flow cytometry. (e) WT C57BL/6 mice were injected subcutaneously with  $5 \times 10^5$  MC38-OVA cells and i.t. treated with 10 $\mu$ g of Erb-sumIL2 on day 9. The tumor tissues were collected on day 14. Antigen-specific CD8<sup>+</sup> T cells in the tumor site were detected using OT-I tetramer. The frequency of OT-I specific CD8<sup>+</sup> T cells among total CD8<sup>+</sup> T cells and the number of OT-I-specific CD8<sup>+</sup> T cells were analyzed by flow cytometry. Two way ANOVA tests were used to analyze the tumor growth data. Unpaired T-tests were used to analyze the other data. ns (not significant), \*P<0.05, \*\*P<0.01, \*\*\*P<0.0001 and \*\*\*\*P<0.0001. One of two or three representative experiments is shown.

## Supplementary Figure 6

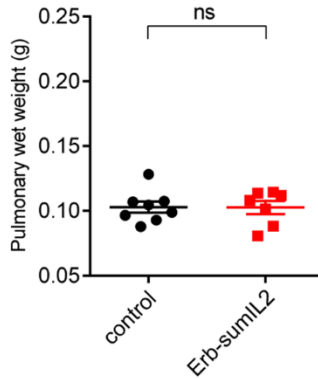

**Supplementary Fig. 6 SumIL-2 therapy does not cause pulmonary edema.** MC38-EGFR5 bearing mice were i.p. treated with 25 $\mu$ g Erb-sumIL2 for three times; the control group was injected with PBS. The wet weight of lung tissue was measured on day 7 post-treatment. Pulmonary wet weight was measured to assess adverse toxic effects following Erb-sumIL2 treatment and was determined by weighing lungs before and after drying. Unpaired T-tests were used to analyze the data.

## Supplementary Table 1

### Antibodies used in this study.

| Antibodies                             | Source              | Identifier      |
|----------------------------------------|---------------------|-----------------|
| InVivoMab anti-mouse CD4 (GK1.5)       | Produced in the lab |                 |
| InVivoMab anti-mouse CD8 (2.43)        | Produced in the lab |                 |
| InVivoMab anti-mouse NK1.1(PK136)      | Produced in the lab |                 |
| InVivoMab anti-mouse PD-L1 (10F.9G2)   | BioXcell            | Cat# BE0101     |
| InVivoMab anti-mouse Ly6G (1A8)        | BioXcell            | Cat# BP0075     |
| Anti-mouse CD45 (FACs, 30-F11)         | Invitrogen          | Cat# 56-0451-82 |
| Anti-mouse CD4 (FACs, RM4-5)           | Invitrogen          | Cat# 45-0042-82 |
| Anti-mouse CD8 (FACs, 53-6.7)          | Invitrogen          | Cat# 47-0081-82 |
| Anti-Foxp3 (FACs, FJK-16s)             | Invitrogen          | Cat# 12-5773    |
| Anti-mouse CD3E (FACs, 145-2C11)       | Invitrogen          | Cat# 25-0031-82 |
| Anti-mouse CD11b (FACs, M1/70)         | Invitrogen          | Cat# 45-0112    |
| Anti-mouse CD274 (FACs, MIH5)          | Invitrogen          | Cat# 12-5982-82 |
| Anti-mouse CD279 (FACs, J43)           | Invitrogen          | Cat# 17-9985-82 |
| Anti-mouse CD185 (FACs, SPRCL5)        | Invitrogen          | Cat# 13-7185-82 |
| Anti-mouse CD11c (FACs, N418)          | Biolegend           | Cat# 117310     |
| Anti-mouse F4/80 (FACs, 8M8)           | Biolegend           | Cat# 123113     |
| Anti-mouse I-A/I-E (FACs, M5/114.15.2) | Biolegend           | Cat# 107628     |
| iTag Tetramer/PE-H-2 Kb OVA (SIINFEKL) | MBL                 | Cat# TB-5001-1  |
| iTag Tetramer/PE-H-2 Kb SIY (SIYRYYGL) | MBL                 | Cat# TS-M008-P  |
